# Supplementary material for: ESR1 Methylation Measured in Cell-Free DNA to Evaluate Endocrine Resistance in Metastatic Breast Cancer Patients
Source: MDPI journal article supplement (doi:10.3390/ijms23105631), 2022-05-18
Supplement: s1 [file s1]

Supplemental data

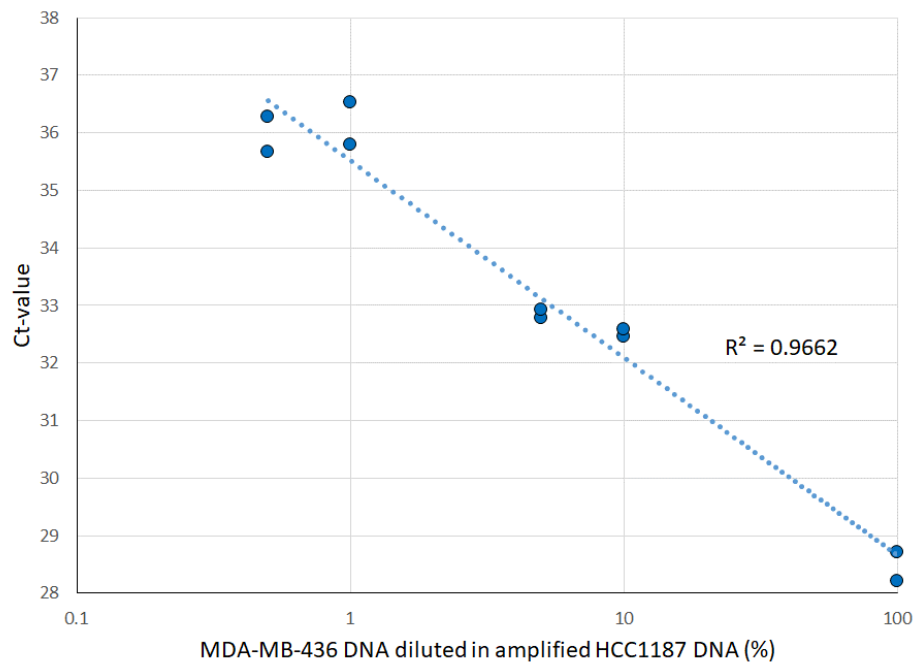

Supplemental Figure S1. Dilution series methylated DNA in unmethylated DNA

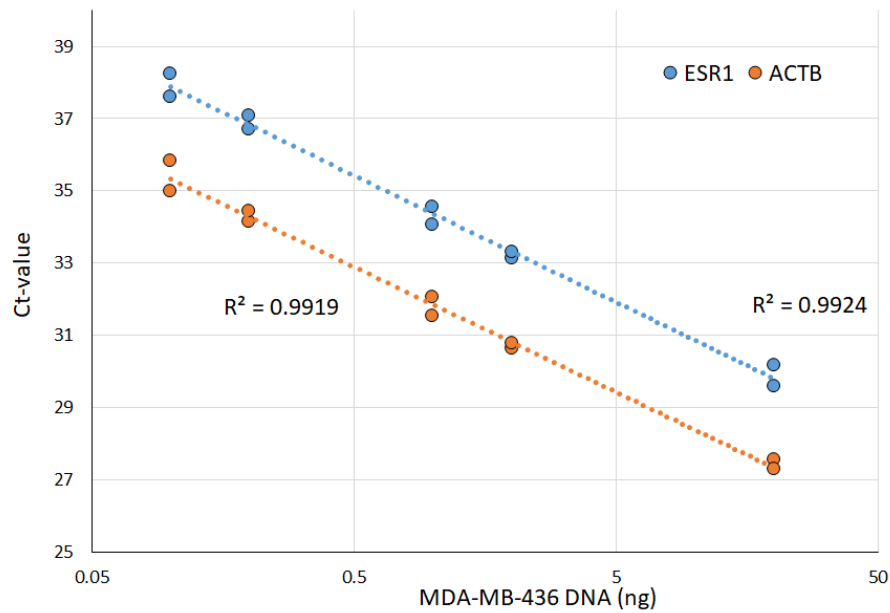

Supplemental Figure S2. Duplex-assay in input-limiting dilution series

## Supplemental Tables

**Table S1.** Age of samples from patients and healthy donors that were included in our study and of which *ESR1* methylation was determined successfully.

|                                        | Cohort 1         |                        |         | Cohort 2         |                       |         |
|----------------------------------------|------------------|------------------------|---------|------------------|-----------------------|---------|
|                                        | Patients<br>n=31 | Healthy donors<br>n=18 |         | Patients<br>n=17 | Healthy donors<br>n=8 |         |
| <b>Median age (range)<br/>in years</b> | 66 (47-88)       | 58 (55-74)             | p=0.009 | 66 (50-84)       | 61 (55-70)            | p=0.391 |

**Table S2.** Location and Cg probes of *ESR1* promoters.

| Cg probe   | Promoter | Chromosome | Start (hg38) | End (hg38) | Gene Symbol |
|------------|----------|------------|--------------|------------|-------------|
| cg08415493 | C        | chr6       | 151803680    | 151803681  | ESR1        |
| cg20893956 | C        | chr6       | 151805601    | 151805602  | ESR1        |
| cg24764793 | C        | chr6       | 151805610    | 151805611  | ESR1        |
| cg07746998 | C        | chr6       | 151805650    | 151805651  | ESR1        |
| cg21157690 | C        | chr6       | 151805760    | 151805761  | ESR1        |
| cg17264271 | C        | chr6       | 151805803    | 151805804  | ESR1        |
| cg20627916 | B        | chr6       | 151807193    | 151807194  | ESR1        |
| cg07671949 | B        | chr6       | 151807203    | 151807204  | ESR1        |
| cg23164938 | B        | chr6       | 151807231    | 151807232  | ESR1        |
| cg23165623 | B        | chr6       | 151807276    | 151807277  | ESR1        |
| cg21614759 | B        | chr6       | 151807291    | 151807292  | ESR1        |
| cg19411146 | B        | chr6       | 151807336    | 151807337  | ESR1        |
| cg21950534 | B        | chr6       | 151807348    | 151807349  | ESR1        |
| cg11813455 | B        | chr6       | 151807380    | 151807381  | ESR1        |
| cg24900983 | B        | chr6       | 151807393    | 151807394  | ESR1        |
| cg05171584 | B        | chr6       | 151807400    | 151807401  | ESR1        |
| cg23467008 | B        | chr6       | 151807402    | 151807403  | ESR1        |
| cg22839866 | B        | chr6       | 151807449    | 151807450  | ESR1        |
| cg23009221 | B        | chr6       | 151807453    | 151807454  | ESR1        |
| cg13612689 | B        | chr6       | 151807499    | 151807500  | ESR1        |
| cg27316393 | B        | chr6       | 151807540    | 151807541  | ESR1        |
| cg00655307 | A        | chr6       | 151807608    | 151807609  | ESR1        |
| cg01777019 | A        | chr6       | 151807670    | 151807671  | ESR1        |
| cg15980539 | A        | chr6       | 151807901    | 151807902  | ESR1        |
| cg11251858 | A        | chr6       | 151807901    | 151807902  | ESR1        |

**Table S3.** Primer sequences of our ESR1 methylation assay. FAM: fluorescein amidite, EQ: eclipse quencher, MGB: minor groove binding moiety, QXL670: dark quencher.

| Name                   |         | Sequence 5' → 3'                                 |
|------------------------|---------|--------------------------------------------------|
| <i>ESR1</i> Promoter A | Forward | GTTTTGGGATTGTATTGTTTTCG                          |
|                        | Reverse | GCCGACACGCGAACTCTAA                              |
|                        | Probe   | <b>FAM-CGATAAAACCGAACGACC-EQ-MGB</b>             |
| <i>ACTB</i>            | Forward | AACCAATAAAACCTACTCCTCCCTTAA                      |
|                        | Reverse | TGGTGATGGAGGAGGTTTAGTAAG                         |
|                        | Probe   | <b>Cy5-ACCACCACCCAACACACAATAACAAACACA-QXL670</b> |
